# Supplementary material for: Surface ligand-mediated isolated growth of Pt on Pd nanocubes for enhanced hydrogen evolution activity
Source: Royal Society of Chemistry journal article supplement (doi:10.1039/c5ta06648d), 2015-01-01
Supplement: c5ta06648d1.pdf [file c5ta06648d1.pdf]

## Surface Ligands-Mediated Isolated Growth of Pt on Pd Nanocube For enhanced Hydrogen Evolution Activity

Fumin Ren,<sup>a</sup> Haiyuan Lu,<sup>a,b</sup> Haotian Liu,<sup>b</sup> Zheng Wang,<sup>a,b</sup> Yuen Wu,<sup>\*b</sup> Yadong Li<sup>\*b</sup>

<sup>a</sup>Department of Municipal & Environmental Engineering, Beijing Jiaotong University, Beijing 100044.

<sup>b</sup>Center of Advanced Nanocatalysis, University of Science and Technology of China (CAN-USTC), Hefei, Anhui 230026 (P. R. China) Collaborative Innovation Center for Nanomaterial Science and Engineering, Tsinghua University, Beijing 100084 (P. R. China)

E-mail: yuenwu@ustc.edu.cn, ydli@mail.tsinghua.edu.c.

### 1. Materials and Methods

#### Materials

Ethylene glycol (EG), L-ascorbic acid (AA) and potassium bromide (KBr) were obtained from Beijing Chemical Reagents, China. Sodium tetrachloropalladate(II) tetrachloride (Na<sub>2</sub>PdCl<sub>4</sub>, 99%), were acquired from Sigma-Aldrich. Pt(acac)<sub>2</sub> (99%), Cu(acac)<sub>2</sub> (99%) and PVP (MW=5,5000, AR) were purchased from Alfa Aesar. All aqueous solutions were prepared using deionized (DI) water with a resistivity of 18.2 M Ω ·cm.

#### Experimental Section

**Synthesis of Pd Nanocubes,<sup>1</sup>** The Pd nanocubes used as seeds for the synthesis of Pd-Pt bimetallic nanocrystals were synthesized by adding a Na<sub>2</sub>PdCl<sub>4</sub> solution into a mixture of PVP, AA and KBr. Typically, PVP (105 mg), AA (60 mg), and KBr (600 mg) were dissolved in DI water (8.0 mL), and then placed in a vial and pre-heated at 80 °C in an oil bath under magnetic stirring for 10 min. Subsequently, Na<sub>2</sub>PdCl<sub>4</sub> (57 mg) was dissolved in DI water (3.0 mL) and then injected into the preheating solution. The mixture of reagents was capped, and maintained at 80 °C for 3 h. The product was collected by centrifugations, washed three times with water to remove excess PVP and inorganic ions, and then re-dispersed in EG (10 mL).

**Synthesis of Pd@L-Pt,** The layered growth mode core-shell structures were synthesized through seed-induced growth methods. In a standard synthesis, L-ascorbic acid (53 mg), 18-nm Pd nanocubes solution in EG (1.0 mL), and EG (6.0 mL) were mixed together in a 25-mL flask. The mixture was pre-heated at 140 °C under magnetic stirring. Meanwhile, Pt(acac)<sub>2</sub> (15.3 mg) and PVP (100 mg) were dissolved in EG (6.0 mL). Then, the EG solution was pumped into the pre-heated mixture held at 140 °C at the rate of 0.4 mL/min. The reaction was allowed to continue for an additional 1 hour to complete. The product was collected by centrifugation, washed twice with ethanol and three times with water, and then re-dispersed in ethanol (1 mL).

**Synthesis of Pd@I-Pt,** The island growth mode core-shell structures were synthesized used the same approach. In a standard synthesis, L-ascorbic acid (53 mg), KBr (54 mg), 18-nm Pd nanocubes solution in EG (1.0 mL), and EG (6.0 mL) were mixed together in a 25-mL flask. The mixture was pre-heated at 140 °C under magnetic stirring. Meanwhile, Pt(acac)<sub>2</sub> (15.3 mg) and PVP (100 mg) were dissolved in EG (6.0 mL). Then, the EG solution was pumped into the pre-heated mixture held at 140 °C at the rate of 0.4 mL/min. The reaction was allowed to continue for

an additional 1 hour to complete. The product was collected by centrifugation, washed twice with ethanol and three times with water, and then re-dispersed in ethanol (1mL).

**Synthesis of Pd@L-PtCu**, In a standard synthesis, L-ascorbic acid (53 mg), 18-nm Pd nanocubes solution in EG(1.0 mL), and EG (6.0 mL) were mixed together in a 25-mL flask. The mixture was pre-heated at 140°C under magnetic stirring. Meanwhile, Pt(acac)<sub>2</sub> (15.3 mg), Cu(acac)<sub>2</sub> (10.2 mg) and PVP (100 mg) were dissolved in EG (6.0 mL). Then, the EG solution was pumped into the pre-heated mixture held at 140 °C at the rate of 0.4 mL/min. The reaction was allowed to continue for an additional 1 hour to complete. The product was collected by centrifugation, washed twice with ethanol and three times with water, and then re-dispersed in ethanol (1mL).

**Synthesis of Pd@I-PtCu and Pd@I-PtCu<sub>3</sub>**, L-ascorbic acid (53 mg), KBr (54 mg), 18-nm Pd nanocubes solution in EG (1.0 mL), and EG (6.0 mL) were mixed together in a 25-mL flask. The mixture was pre-heated at 140°C under magnetic stirring. Meanwhile, Pt(acac)<sub>2</sub> (15.3 mg), Cu(acac)<sub>2</sub> (10.2 mg for Pd@PtCu and 30.6 mg for Pd@PtCu<sub>3</sub>) and PVP (100 mg) were dissolved in EG (6.0 mL). Then, the EG solution was pumped into the pre-heated mixture held at 140°C at the rate of 0.4 mL/min. The reaction was allowed to continue for an additional 1 hour to complete. The product was collected by centrifugation, washed twice with ethanol and three times with water, and then re-dispersed in ethanol (1mL).

## **Electrochemical measurements**

Electrochemical measurements were performed using a glassy carbon rotating disk electrode. A leak-free AgCl/Ag/KCl (3M) electrode was used as the reference. All potentials were converted to values with reference to a reversible hydrogen electrode (RHE). The counter electrode was a platinum wire. The electrolyte was 0.5 M H<sub>2</sub>SO<sub>4</sub>.

### **Preparation of working electrode**

For the catalyst supported on Vulcan XC-72 carbon (20wt% of Pt and 5% Nafion solution) was prepared to an ethanol solution of 4mg/mL(based on ICP-MS measurement), and sonicated for 30 min. 8 microliters of the dispersion was then transferred onto the glassy carbon RDE with a geometric area of 0.196cm<sup>2</sup>. Drying in air for 30 minutes before measurement.

### **Hydrogen evolution reaction (HER)**

The HER measurements were performed in 0.5 M H<sub>2</sub>SO<sub>4</sub> solutions under flow of N<sub>2</sub> using the glassy carbon RDE at a rotation rate of 1,600 rpm and a sweep rate of 50 mV/s. In order to produce a clean electrode surface, 60 potential sweeps between -0.05 and 1.3 V versus RHE were applied to the electrode prior to the HER measurement. In the HER polarization curve, current densities were normalized in reference to the geometric area of the glassy carbon RDE (0.196 cm<sup>2</sup>).

## 2. Figures and Schemes

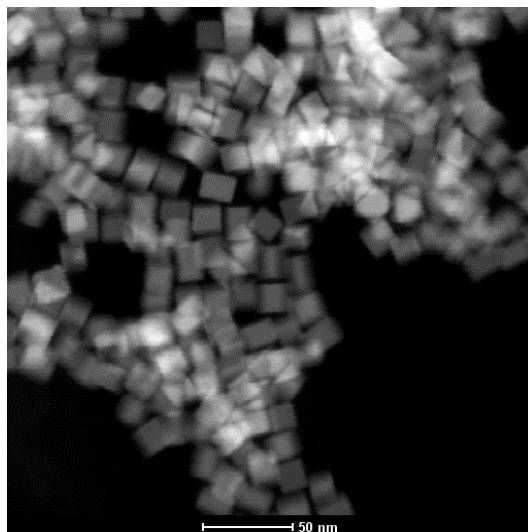

**Figure S1:** HAADF-STEM image of layered growth mode Pd@L-Pt

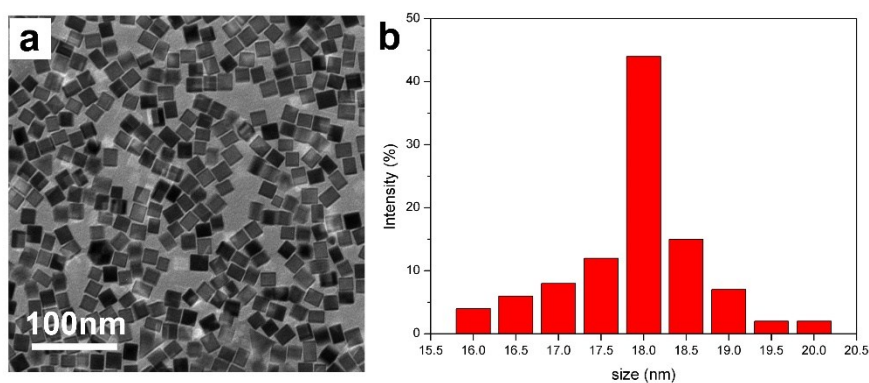

**Figure S2:** (a) TEM image of Pd nanocubes and (b) their diameter and intensity ratio distribution. The average diameter is  $18\text{nm} \pm 2\text{nm}$ , by measuring 100 particles.

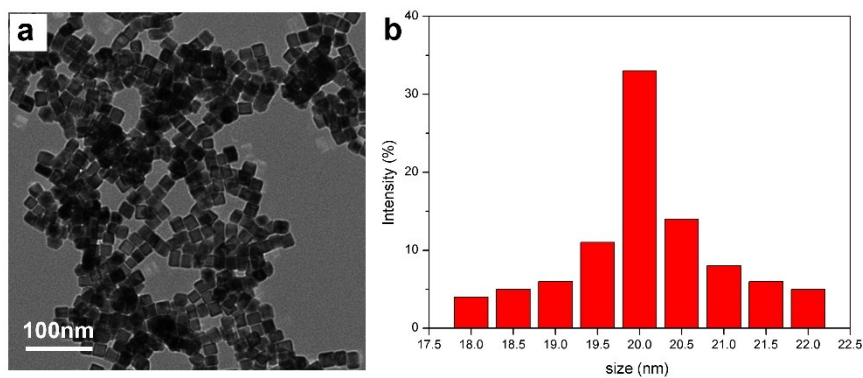

**Figure S3:** (a) TEM image of layered growth mode Pd@L-Pt and (b) their diameter and intensity ratio distribution. The average diameter is  $20\text{nm} \pm 2\text{nm}$ , by measuring 100 particles.

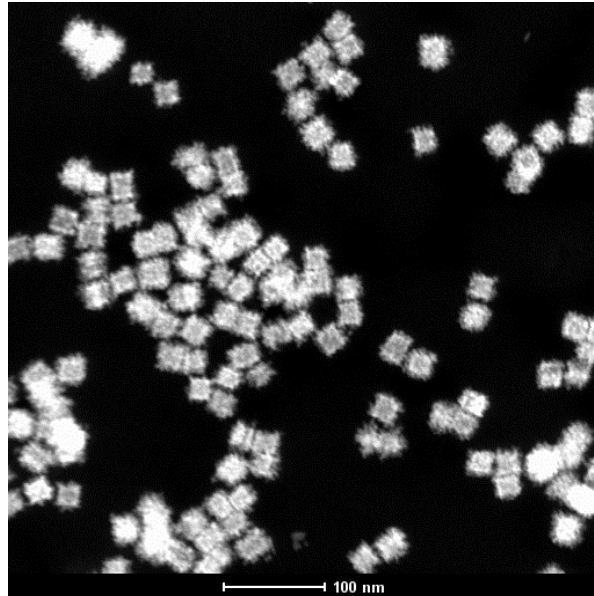

**Figure S4:** HAADF-STEM image of island growth mode Pd@I-Pt

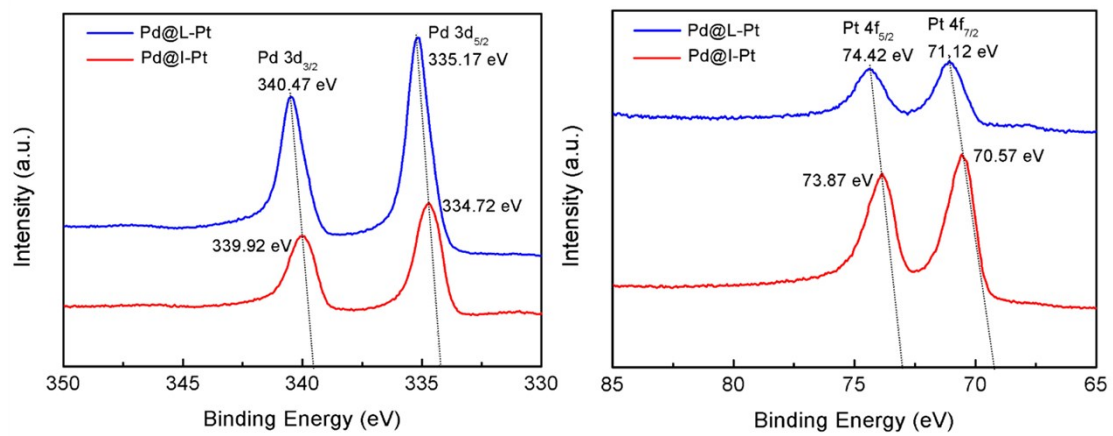

**Figure S5 :** XPS spectra of Pd 3d (left) and Pt 4f (right) for Pd @ L-Pt and Pd @ I-Pt.

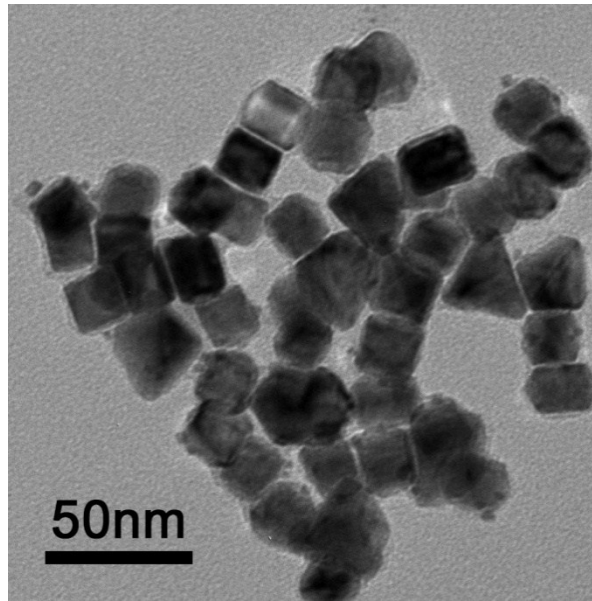

Figure S6: TEM image of Layered growth mode Pd@L-PtCu

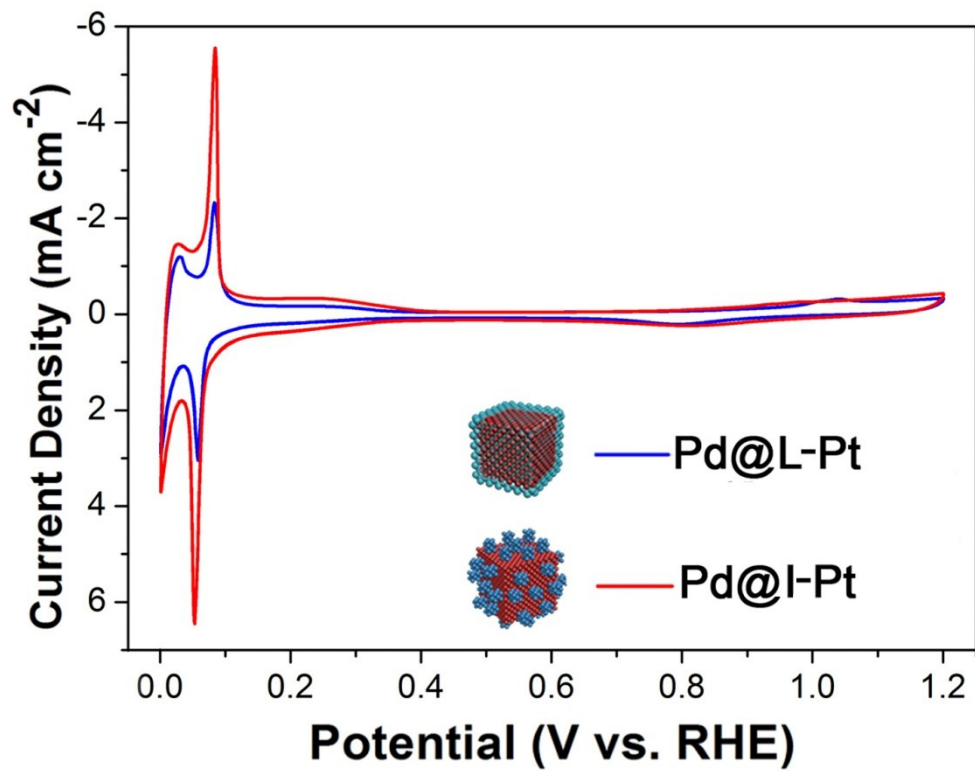

Figure S7: CV curves for the Pd@Pt with layered growth mode and island growth mode. The calculated ECSA for Pd@L-Pt is 33.8cm<sup>2</sup>/mg and for Pd@I-Pt is 127cm<sup>2</sup>/mg.

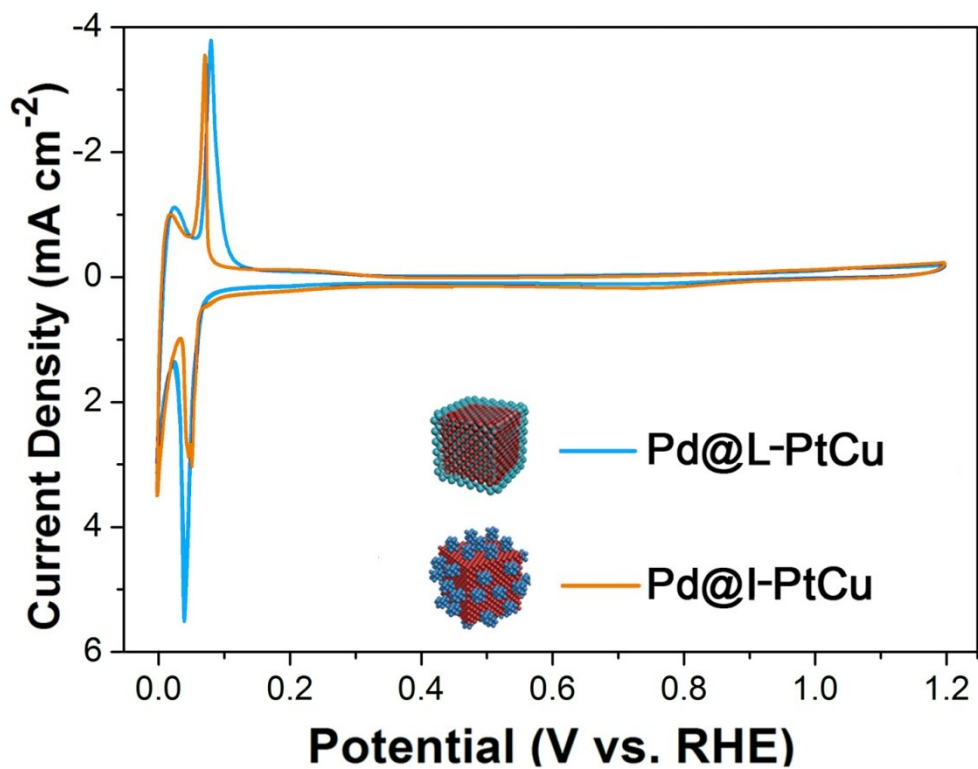

Figure S8: CV curves for the Pd@PtCu with layered growth mode and island growth mode

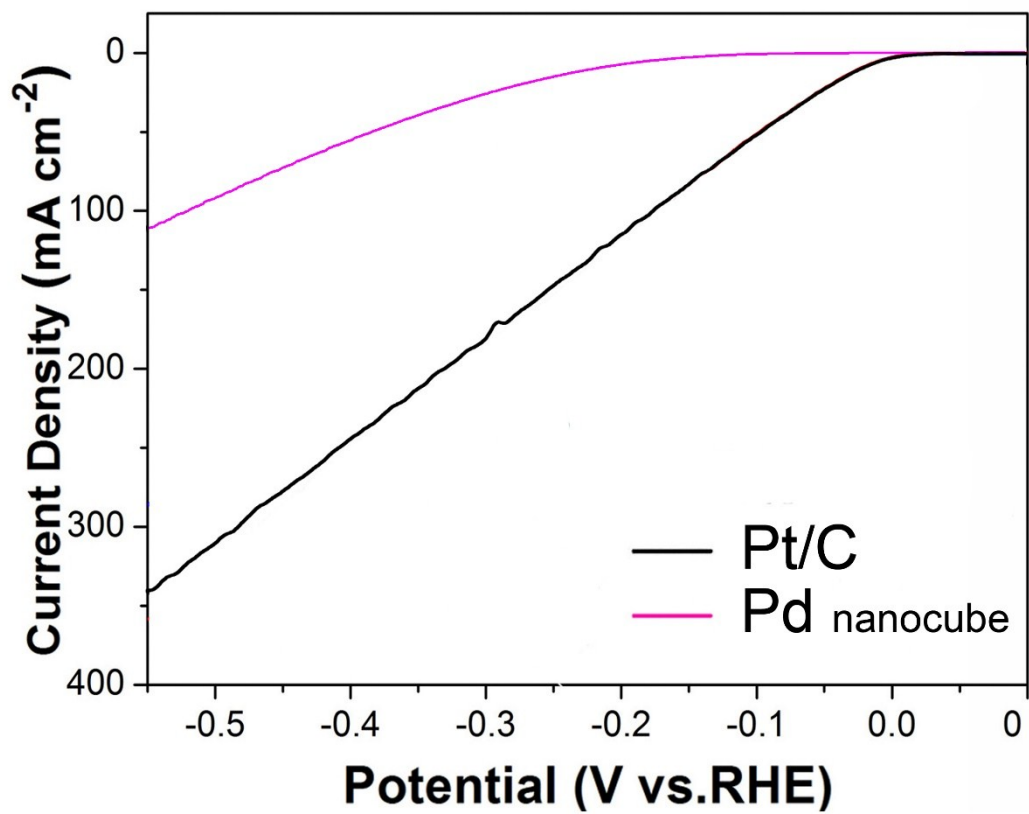

Figure S9: HER electrocatalytic properties of Pd nanocube and Pt/C

**Table S1:** ICP-MS datas of Pd@PtCu and Pd@PtCu<sub>3</sub>

| entry | Precursor molar ratios<br>(Pt-Cu) | Analyzed Pt molarity<br>μg/mL | Analyzed Cu molarity<br>μg/mL |
|-------|-----------------------------------|-------------------------------|-------------------------------|
| 1     | 1:1                               | 110.1                         | 32.35                         |
| 2     | 1:3                               | 258.48                        | 226.8                         |

## References

1. H. Zhang, M. Jin, H. Liu, J. Wang, M. J. Kim, D. Yang, Z. Xie, J. Liu and Y. Xia, *ACS nano*, 2011, **5**, 8212-8222.
